# Supplementary material for: Bryce Echenique y los tiempos de la escritura
Source: Springer Nature journal article supplement (doi:10.1186/s12859-015-0664-3), 2003-01-01
Supplement: 12859_2015_664_MOESM1_ESM.pdf [file 12859_2015_664_MOESM1_ESM.pdf]

# Additional File 1: Mathematical Proof for Propositions 1 and 2

## Proof for Proposition 1

Let  $N(\xi_{\mu_{g2}-\mu_{g1}}, \sigma_{\mu_{g2}-\mu_{g1}}^2)$  denote the posterior distribution of  $\mu_{g2} - \mu_{g1}$ . Then we have

$$\begin{aligned} \gamma_g &= Pr\left(\frac{|\mu_{g2} - \mu_{g1}|}{\sigma_{\mu_{g2}-\mu_{g1}}} > 2 \mid D_{obs}\right) > \gamma_0 \Leftrightarrow Pr\left(-2 < \frac{\mu_{g2} - \mu_{g1}}{\sigma_{\mu_{g2}-\mu_{g1}}} < 2 \mid D_{obs}\right) \leq 1 - \gamma_0 \\ &\Leftrightarrow Pr\left(-2 - \frac{\xi_{\mu_{g2}-\mu_{g1}}}{\sigma_{\mu_{g2}-\mu_{g1}}} < \frac{\mu_{g2} - \mu_{g1} - \xi_{\mu_{g2}-\mu_{g1}}}{\sigma_{\mu_{g2}-\mu_{g1}}} < 2 - \frac{\xi_{\mu_{g2}-\mu_{g1}}}{\sigma_{\mu_{g2}-\mu_{g1}}} \mid D_{obs}\right) \leq 1 - \gamma_0 \\ &\Leftrightarrow \Phi\left(2 - \frac{\xi_{\mu_{g2}-\mu_{g1}}}{\sigma_{\mu_{g2}-\mu_{g1}}}\right) - \Phi\left(-2 - \frac{\xi_{\mu_{g2}-\mu_{g1}}}{\sigma_{\mu_{g2}-\mu_{g1}}}\right) \leq 1 - \gamma_0. \end{aligned} \quad (0.1)$$

When  $\xi_{\mu_{g2}-\mu_{g1}} \geq 0$ ,  $\Phi\left(-2 - \frac{\xi_{\mu_{g2}-\mu_{g1}}}{\sigma_{\mu_{g2}-\mu_{g1}}}\right) < \Phi(-2)$  and using (0.1), we obtain  $\Phi\left(2 - \frac{\xi_{\mu_{g2}-\mu_{g1}}}{\sigma_{\mu_{g2}-\mu_{g1}}}\right) \leq 1 - \gamma_0 + \Phi(-2)$ , which implies  $\frac{\xi_{\mu_{g2}-\mu_{g1}}}{\sigma_{\mu_{g2}-\mu_{g1}}} > 2 - \Phi^{-1}(1 + \Phi(-2) - \gamma_0)$ . Thus,  $\max\{Pr(\mu_{g2} - \mu_{g1} > 0 \mid D_{obs}), Pr(\mu_{g2} - \mu_{g1} < 0 \mid D_{obs})\} = \max\left\{\Phi\left(\frac{\xi_{\mu_{g2}-\mu_{g1}}}{\sigma_{\mu_{g2}-\mu_{g1}}}\right), 1 - \Phi\left(\frac{\xi_{\mu_{g2}-\mu_{g1}}}{\sigma_{\mu_{g2}-\mu_{g1}}}\right)\right\} = \Phi\left(\frac{\xi_{\mu_{g2}-\mu_{g1}}}{\sigma_{\mu_{g2}-\mu_{g1}}}\right) > \Phi(2 - \Phi^{-1}(1 + \Phi(-2) - \gamma_0))$ . When  $\xi_{\mu_{g2}-\mu_{g1}} < 0$ , we have  $\Phi\left(-2 + \frac{\xi_{\mu_{g2}-\mu_{g1}}}{\sigma_{\mu_{g2}-\mu_{g1}}}\right) < \Phi(-2)$ . It is easy to show that (0.1) can be rewritten as

$$\Phi\left(2 + \frac{\xi_{\mu_{g2}-\mu_{g1}}}{\sigma_{\mu_{g2}-\mu_{g1}}}\right) - \Phi\left(-2 + \frac{\xi_{\mu_{g2}-\mu_{g1}}}{\sigma_{\mu_{g2}-\mu_{g1}}}\right) \leq 1 - \gamma_0. \quad (0.2)$$

Using (0.2), we obtain  $\Phi\left(2 + \frac{\xi_{\mu_{g2}-\mu_{g1}}}{\sigma_{\mu_{g2}-\mu_{g1}}}\right) \leq 1 + \Phi(-2) - \gamma_0$ , which implies  $-\frac{\xi_{\mu_{g2}-\mu_{g1}}}{\sigma_{\mu_{g2}-\mu_{g1}}} \geq 2 - \Phi^{-1}(1 + \Phi(-2) - \gamma_0)$ . Thus,  $\max\{Pr(\mu_{g2} - \mu_{g1} > 0 \mid D_{obs}), Pr(\mu_{g2} - \mu_{g1} < 0 \mid D_{obs})\} = 1 - \Phi\left(\frac{\xi_{\mu_{g2}-\mu_{g1}}}{\sigma_{\mu_{g2}-\mu_{g1}}}\right) = \Phi\left(-\frac{\xi_{\mu_{g2}-\mu_{g1}}}{\sigma_{\mu_{g2}-\mu_{g1}}}\right) \geq \Phi\left(2 - \Phi^{-1}(1 + \Phi(-2) - \gamma_0)\right)$  when  $\xi_{\mu_{g2}-\mu_{g1}} < 0$ , which completes the proof.

## Proof for Proposition 2

Let  $d_g = \bar{x}_{g2} - \bar{x}_{g1}$ . The conditional posterior distribution of the difference in the mean parameters of the intensities from the two biological conditions  $\mu_{g2} - \mu_{g1}$  under the alternative hypothesis follow a normal distribution of  $\delta_g \sim \mathcal{N}(U_{\delta_g} \times S_{\delta_g}^2, S_{\delta_g}^2)$ , where  $U_{\delta_g} = \frac{n_g}{2\sigma_g^2} d_g$  and  $S_{\delta_g}^{-2} = \frac{1}{\omega^2} + \frac{n_g}{2\sigma_g^2}$ . The confident difference criterion method declares a gene to be DE if

$$\gamma_g = Pr\left(\frac{|\mu_{g2} - \mu_{g1}|}{\sigma_{\mu_{g2}-\mu_{g1}}} > 2 \mid D_{obs}\right) \geq \gamma_0. \quad (0.3)$$

After some algebra, we can show that (0.3) is equivalent to

$$|U_{\delta_g} S_{\delta_g}| = \left| \frac{n_g}{2\sigma_g^2} (\bar{x}_{g1} - \bar{x}_{g2}) \right| \left[ \frac{1}{\omega^2} + \frac{n_g}{2\sigma_g^2} \right]^{-\frac{1}{2}} = |d_g| \left[ \frac{2\sigma_g^2}{n_g} \left( \frac{2\sigma_g^2}{n_g\omega^2} + 1 \right) \right]^{-\frac{1}{2}} \geq |E_g^*|, \quad (0.4)$$

where the value of  $|E_g^*|$  depends on the cut-off value  $\gamma_0$  through  $\Phi(2 + E_g^*) - \Phi(-2 + E_g^*) = 1 - \gamma_0$ . Following Yu et al.[1], the CBF method declares a gene to be DE if the Bayes factor  $BF_{01}(g) = \left( \frac{n_g\omega^2}{2\sigma_g^2} + 1 \right)^{\frac{1}{2}} \exp \left\{ - \frac{n_g d_g^2}{4\sigma_g^2 \left( 1 + \frac{2\sigma_g^2}{n_g\omega^2} \right)} \right\} \leq C_0$ , which is equivalent to

$$|d_g| \geq \sqrt{\frac{2\sigma_g^2}{n_g} \left( 1 + \frac{2\sigma_g^2}{n_g\omega^2} \right) \left[ \log \left( \frac{n_g\omega^2}{2\sigma_g^2} + 1 \right) - 2 \log(C_0) \right]}. \quad (0.5)$$

By choosing  $C_0$  to satisfy

$$\Phi \left( 2 + \log \left( \frac{n_g\omega^2}{2\sigma_g^2} + 1 \right) - 2 \log(C_0) \right) - \Phi \left( -2 + \log \left( \frac{n_g\omega^2}{2\sigma_g^2} + 1 \right) - 2 \log(C_0) \right) = 1 - \gamma_0,$$

(0.4) and (0.5) are equivalent when  $\log \left( \frac{n_g\omega^2}{2\sigma_g^2} + 1 \right) > 2 \log(C_0)$ . Thus, the confident difference criterion method agrees with the CBF method. This completes the proof.

## References

- [1] Yu F, Chen M-H, Kuo L: Detecting differentially expressed genes using calibrated Bayes factors. *Statistica Sinica* 2008; 18: 783-802.
