# Supplementary material for: Confident difference criterion: a new Bayesian differentially expressed gene selection algorithm with applications
Source: PubMed Central journal article supplement (PMC4527130; doi:10.1186/s12859-015-0664-3), 2015-08-07
Supplement: 12859_2015_664_MOESM2_ESM.pdf [file 12859_2015_664_MOESM2_ESM.pdf]

## Supplemental Table 1: Canonical Pathways Identified by Methods I & II

|           | Name                                              | p-value  | Relevant Articles                                                                 |
|-----------|---------------------------------------------------|----------|-----------------------------------------------------------------------------------|
| Method I  | Hepatic Fibrosis/Hepatic Stellate Cell Activation | 5.31E-05 | Maroni and Davis 2012 [7]                                                         |
|           | Glucocorticoid Receptor Signaling                 | 4.81E-04 | Komiyama et al. 2008; Shenavai et al. 2012 [5, 12]                                |
|           | MIF-mediated Glucocorticoid Regulation            | 7.88E-04 | Gonzalez et al. 2010; Li et al. 2011 [3, 6]                                       |
|           | Agranulocyte Adhesion and Diapedesis              | 1.22E-03 | Poole et al. 2012; Poole et al. 2013 [10, 11]                                     |
|           | Role of IL-17A in Arthritis                       | 2.01E-03 | Ozkan et al. 2014 [9]                                                             |
| Method II | Hepatic Fibrosis/Hepatic Stellate Cell Activation | 1.83E-07 | Maroni and Davis 2012 [7]                                                         |
|           | Glucocorticoid Receptor Signaling                 | 3.53E-04 | Komiyama et al. 2008; Shenavai et al. 2012 [5, 12]                                |
|           | IL-8 Signaling                                    | 5.09E-04 | Atli et al. 2012; Talbott et al. 2014 [1, 14]                                     |
|           | Granulocyte Adhesion and Diapedesis               | 6.78E-04 | Jiemtaweeboon et al. 2011; Shirasuna et al. 2012; Talbott et al. 2014 [4, 13, 14] |
|           | Bladder Cancer Signaling                          | 8.23E-04 | Berisha et al., 2006; Neuvians et al., 2004 [2, 8]                                |

## References

- [1] Atli MO, Bender RW, Mehta V, Bastos MR, Luo W, Vezina CM, Wiltbank MC: Patterns of gene expression in the bovine corpus luteum following repeated intrauterine infusions of low doses of prostaglandin  $F_2\alpha$ . *Biol Reprod* 2012; 86(4):130.
- [2] Berisha B, Welter H, Shimizu T, Miyamoto A, Meyer HH, Schams D: Expression of fibroblast growth factor 1 (FGF1) and FGF7 in mature follicles during the periovulatory period after GnRH in the cow. *J Reprod Dev* 2006; 52(2):307-313.
- [3] González F, Rote NS, Minium J, Weaver AL, Kirwan JP: Elevated circulating levels of macrophage migration inhibitory factor in polycystic ovary syndrome. *Cytokine* 2010; 51(3):240-244.
- [4] Jiemtaweeboon S, Shirasuna K, Nitta A, Kobayashi A, Schuberth HJ, Shimizu T, Miyamoto A: Evidence that polymorphonuclear neutrophils infiltrate into the developing corpus luteum and promote angiogenesis with interleukin-8 in the cow. *Reprod Biol Endocrin* 2011; 9:79.
- [5] Komiyama J, Nishimura R, Lee H-Y, Sakumoto R, Tetsuka M, Acosta TJ, Skarzynski DJ, Okuda K: Cortisol Is a Suppressor of Apoptosis in Bovine Corpus Luteum. *Biol Reprod* 2008; 78(5):888-895.
- [6] Li C, Qiao B, Zhan Y, Qi W, Chen ZJ: First evidence of genetic association between the MIF-173G/C single-nucleotide polymorphisms and polycystic ovary syndrome. *Am J Reprod Immunol* 2011; 66(5):416-422.
- [7] Maroni D, Davis JS: TGFB1 disrupts the angiogenic potential of microvascular endothelial cells of the corpus luteum. *J Cell Sci* 2012; 124(14):2501-2510.

- [8] Neuvians TP, Berisha B, Schams D: Vascular endothelial growth factor (VEGF) and fibroblast growth factor (FGF) expression during induced luteolysis in the bovine corpus luteum. *Mol Reprod Dev* 2004; 67(4):389-395.
- [9] Ozkan ZS, Deveci D, Kumbak B, Simsek M, Ilhan F, Sekercioglu S, Sapmaz E: What is the impact of Th1/Th2 ratio, SOCS3, IL17, and IL35 levels in unexplained infertility? *J Reprod Immunol* 2014; 103:53-58.
- [10] Poole DH, Pate JL: Luteal microenvironment directs resident T lymphocyte function in cows. *Biol Reprod* 2012; 86(2):29.
- [11] Poole DH, Ndiaye K, Pate JL: Expression and regulation of secreted phosphoprotein 1 in the bovine corpus luteum and effects on T lymphocyte chemotaxis. *Reproduction* 2013; 146(6):527-537.
- [12] Shenavai S, Preissing S, Hoffmann B, Dilly M, Pfarrer C, Ózalp GR, Caliskan C, Seyrek-Intas K, Schuler G: Investigations into the mechanisms controlling parturition in cattle. *Reproduction* 2012; 144(2):279-292.
- [13] Shirasuna K, Jiemtaweeboon S, Raddatz S, Nitta A, Schuberth HJ, Bollwein H, Shimizu T, Miyamoto A: Rapid accumulation of polymorphonuclear neutrophils in the Corpus luteum during prostaglandin F(2 $\alpha$ )-induced luteolysis in the cow. *PLoS One* 2012; 7(1):e29054.
- [14] Talbott H, Delaney A, Zhang P, Yu Y, Cushman RA, Cupp AS, Hou X, Davis JS: Effects of IL8 and immune cells on the regulation of luteal progesterone secretion. *Reproduction* 2014; 148(1):21-31.
